# Supplementary material for: Neurodevelopmental outcomes at age 5 among children born preterm: EPIPAGE-2 cohort study
Source: PubMed Central journal article supplement — BMJ. 2021 Apr 28;373:n741. doi: 10.1136/bmj.n741 (PMC8080137; doi:10.1136/bmj.n741), 2021-04-28
Supplement: piev063241.ww1.pdf [file piev063241.ww1.pdf]

## Web appendix 1: The ELFE Cohort

### Mode of selection of children from the ELFE cohort and strategy for correction of the non-representativeness of the reference sample

Term-born children were selected from the ELFE cohort, <sup>1</sup> a contemporary national study of children born in 2011 in a random sample of maternity units in metropolitan France (<https://elfe-france.fr/>). Inclusion criteria were single or twin live births at  $\geq 33$  weeks of gestation during 25 selected days in four waves over 2011; 18329 children were included at birth and 11289 participated in the data collection planned for all participants in the ELFE study at 5 years through a phone interview. To obtain reference data for the EPIPAGE-2 cohort at 5 ½ years, the objective was to assess ELFE children with the EPIPAGE-2 follow-up protocol. For financial and organisational reasons, the assessment used in EPIPAGE-2 could only be offered to 600 children from the ELFE cohort. This size of reference group was sufficient to obtain good precision for estimated scores of the main scales used (FISQ (100 95%CI (98.8-101.2), MABC-2 (10 95%CI (9.8-10.2)) and SDQ (10 95%CI (9.6-10.4)) based on known means and standard deviations. Children from the ELFE cohort eligible for assessment were singletons, born between 37 and 41 weeks of gestation, during the 2 last inclusion periods in 2011 (between September 27<sup>th</sup>-29<sup>th</sup> and October 1<sup>st</sup>-4<sup>th</sup> or between November 28<sup>th</sup>-30<sup>th</sup> and December 1<sup>st</sup>-5<sup>th</sup>). Among the 3430 eligible children, parents of 2846 (83%) agreed to participate in the 5 ½ year EPIPAGE-2 assessment. Parents of 1405 children were contacted by telephone by the EPIPAGE-2 team and 237 declined participation. Recruitment was stopped when 600 children had been assessed. For 8 children, the consent form was invalid and the reference group was based on results of 592 children. The Wechsler Preschool and Primary Scale of Intelligence-Fourth edition (WPPSI-IV, allowing calculation of a full-scale intelligence quotient) was completed by 585 children, the Strengths and Difficulties Questionnaire was available for 584 children, and scores of the Movement Assessment Battery for Children-Second edition (MABC-2) were calculated for 543 children, following exclusion of children with cerebral palsy, severe or moderate sensory disabilities, and full-scale intelligence quotient  $< 2$  standard deviations below the mean. A weighting procedure (simultaneous calibration) was used to correct for the non-representativeness of the sample taking into account the sampling plan and refusals at maternity unit or individual levels. <sup>2</sup> Data were calibrated using marginal distributions obtained from national statistical data and the 2010 French National Perinatal study <sup>3</sup> for the following variables for mothers: maternal age, region of birth, immigration status, level of education, marital status, parity, attendance at antenatal courses, cohabitation status at birth, alcohol consumption during pregnancy, occupational status at the time of delivery; and, for fathers: age, occupational status at the time of delivery. Calibration was performed with CALMAR macro using SAS v9.4 software. <sup>4</sup> Tables below show maternal level of education, socioeconomic status, and paternal socioeconomic status after weighting in the reference sample and in the total ELFE cohort together with parents' assessment of child health, behavioural difficulties, and use of complex developmental interventions at 5 years.

1. Charles M-A, Thierry X, Lanoe J-L, et al. Cohort Profile: The French National cohort of children ELFE: birth to 5 years. *Int J Epidemiol* 2019. PMID 31747017. DOI: [10.1093/ije/dyz227](https://doi.org/10.1093/ije/dyz227)

2. [https://pandora-elfe.inserm.fr/doc/Pondérations\\_enquêtes\\_nationales.pdf](https://pandora-elfe.inserm.fr/doc/Pondérations_enquêtes_nationales.pdf). Accessed March 31, 2021

3. Blondel B, Coulm B, Bonnet C et al. Trends in Perinatal Health in Metropolitan France From 1995 to 2016: Results From the French National Perinatal Surveys. *J Gynecol Obstet Hum Reprod*, 46 (10), 701-713. DOI: [10.1016/j.jogoh.2017.09.002](https://doi.org/10.1016/j.jogoh.2017.09.002)

4. La macro SAS CALMAR. <https://www.insee.fr/fr/information/2021902>. Accessed October 1, 2020

**Maternal and paternal characteristics at birth in the total ELFE cohort and in the reference sample\*: weighted percentages.**

|                                           | <b>ELFE total cohort<br/>Weighted %</b> | <b>ELFE reference sample*<br/>Weighted %</b> |
|-------------------------------------------|-----------------------------------------|----------------------------------------------|
| <b>Maternal age</b>                       |                                         |                                              |
| <25 years                                 | 12.7                                    | 12.4                                         |
| 25-34 years                               | 65.6                                    | 67.0                                         |
| ≥ 35 years                                | 21.8                                    | 20.6                                         |
| <b>Primiparous</b>                        | 44.4                                    | 44.8                                         |
| <b>Mother born in France</b>              | 81.4                                    | 81.6                                         |
| <b>Living in a couple</b>                 | 92.7                                    | 93.9                                         |
| <b>Maternal level of education</b>        |                                         |                                              |
| ≤ Secondary school                        | 25.3                                    | 22.0                                         |
| High school Degree                        | 20.0                                    | 21.2                                         |
| Post graduate or higher                   | 54.1                                    | 56.5                                         |
| Missing                                   | 0.6                                     | 0.3                                          |
| <b>Maternal socio-economic status</b>     |                                         |                                              |
| Professional                              | 15.3                                    | 15.6                                         |
| Intermediate                              | 20.3                                    | 24.9                                         |
| Employee, service workers, manual workers | 55.1                                    | 54.8                                         |
| Other                                     | 8.0                                     | 4.4                                          |
| Missing                                   | 1.3                                     | 0.3                                          |
| <b>Paternal socio-economic status</b>     |                                         |                                              |
| Professional                              | 20.0                                    | 20.0                                         |
| Intermediate                              | 12.5                                    | 16.1                                         |
| Employee, service workers, manual workers | 52.1                                    | 48.0                                         |
| Other                                     | 12.0                                    | 12.7                                         |
| Missing                                   | 3.3                                     | 3.2                                          |

\* Reference sample based on the 592 children evaluated at 5 ½ years of age

**Parents' assessment of child health, behavioural difficulties and complex developmental interventions at 5 years of age in the total ELFE cohort and in the reference sample\*: weighted percentages.**

|                                            | <b>ELFE total cohort<br/>Weighted %</b> | <b>ELFE reference sample*<br/>Weighted %</b> |
|--------------------------------------------|-----------------------------------------|----------------------------------------------|
| <b>Child health assessed by parents</b>    |                                         |                                              |
| Good health                                | 78.8                                    | 74.9                                         |
| Rather healthy                             | 19.5                                    | 24.3                                         |
| Rather unhealthy                           | 0.6                                     | 0.1                                          |
| Poor health                                | 0.2                                     | 0.7                                          |
| Missing                                    | 1.0                                     | 0.0                                          |
| <b>Behavioural difficulties</b>            |                                         |                                              |
| Total SDQ score, mean (standard deviation) | 8.8 (4.9)                               | 10.1 (5.6)                                   |
| <b>Complex developmental interventions</b> |                                         |                                              |
| Psychologist                               | 9.0                                     | 10.4                                         |
| Speech therapist                           | 15.2                                    | 17.1                                         |
| Psychomotor therapist                      | 3.8                                     | 5.0                                          |

SDQ= Strengths and Difficulties Questionnaire (Goodman, 1997)

\* Reference sample based on the 592 children evaluated at 5 ½ years of age

**Web appendix 2.** Type of variables, models used to predict missing data, and percentages of missing values for each variable included in the imputation model (N=4441 survivors at 5 ½ years eligible for follow-up in the EPIPAGE-2 study).

| Variables                              | Type of variable              | Model used to predict missing data | Percentages of missing values among survivors at 5½ years |
|----------------------------------------|-------------------------------|------------------------------------|-----------------------------------------------------------|
| <b>Perinatal characteristics</b>       |                               |                                    |                                                           |
| Birth region of the child              | Categorical                   | No missing data                    | 0%                                                        |
| Gestational age                        | Continuous                    | No missing data                    | 0%                                                        |
| Maternal age at birth                  | Categorical<br>(3 categories) | No missing data                    | 0%                                                        |
| Primiparity                            | Binary                        | Logistic regression                | 1%                                                        |
| Maternal birth outside France          | Binary                        | Logistic regression                | 1%                                                        |
| Parents' socio-economic status*        | Categorical<br>(5 categories) | Multinomial regression             | 5%                                                        |
| Maternal level of education            | Categorical<br>(5 categories) | Multinomial regression             | 7%                                                        |
| Living in a couple                     | Binary                        | Logistic regression                | 5%                                                        |
| Antenatal steroids                     | Binary                        | Logistic regression                | 2%                                                        |
| Multiple pregnancy                     | Binary                        | No missing data                    | 0%                                                        |
| Caesarean section                      | Binary                        | Logistic regression                | <1%                                                       |
| Sex                                    | Binary                        | Logistic regression                | <1%                                                       |
| Small-for-gestational age <sup>†</sup> | Binary                        | Logistic regression                | <1%                                                       |
| Major congenital malformation          | Binary                        | No missing data                    | 0%                                                        |
| Inborn                                 | Binary                        | No missing data                    | 0%                                                        |
| Surfactant                             | Binary                        | Logistic regression                | 1%                                                        |
| Severe cerebral lesions                | Binary                        | Logistic regression                | 1%                                                        |
| Severe bronchopulmonary dysplasia      | Binary                        | Logistic regression                | 3%                                                        |
| Severe necrotising enterocolitis       | Binary                        | Logistic regression                | 2%                                                        |
| Severe retinopathy of prematurity      | Binary                        | Logistic regression                | 1%                                                        |
| Late onset sepsis                      | Binary                        | Logistic regression                | 1%                                                        |
| Breast milk at discharge               | Categorical<br>(3 categories) | Multinomial regression             | 7%                                                        |
| <b>At 2 years corrected age</b>        |                               |                                    |                                                           |
| Cerebral Palsy                         | Categorical<br>(5 categories) | Multinomial regression             | 19%                                                       |
| Other abnormal neuro motor signs       | Binary                        | Logistic regression                | 19%                                                       |
| Hearing disabilities                   | Categorical<br>(3 categories) | Logistic regression                | 21%                                                       |
| Visual disabilities                    | Categorical<br>(3 categories) | Logistic regression                | 23%                                                       |
| ASQ Communication score                | Continuous                    | Predictive mean matching           | 18%                                                       |
| ASQ Gross motor score                  | Continuous                    | Predictive mean matching           | 20%                                                       |
| ASQ Fine motor score                   | Continuous                    | Predictive mean matching           | 21%                                                       |
| ASQ Problem solving score              | Continuous                    | Predictive mean matching           | 21%                                                       |
| ASQ Personal-social score              | Continuous                    | Predictive mean matching           | 21%                                                       |
| Small lexical size                     | Binary                        | Logistic regression                | 23%                                                       |
| <b>At 5 ½ years</b>                    |                               |                                    |                                                           |
| Cerebral Palsy                         | Categorical<br>(5 categories) | Multinomial regression             | 31%                                                       |
| Hearing disabilities                   | Categorical<br>(4 categories) | Multinomial regression             | 32%                                                       |
| Visual disabilities                    | Categorical<br>(4 categories) | Multinomial regression             | 34%                                                       |
| MABC-2 Manual Dexterity score          | Continuous                    | Predictive mean matching           | 41%                                                       |
| MABC-2 Aiming & Catching score         | Continuous                    | Predictive mean matching           | 41%                                                       |
| MABC-2 Balance score                   | Continuous                    | Predictive mean matching           | 41%                                                       |
| MABC-2 Total score                     | Continuous                    | Predictive mean matching           | 42%                                                       |

**Web appendix 2.** Type of variables, model used to predict missing data, and percentages of values missing for each variable included in the imputation model (N=4441 survivors at 5½ years eligible for follow-up in the EPIPAGE-2 study). **(Continued)**

| Variable                                  | Type of variable           | Model used to predict missing data | Percentages of missing values among survivors at 5½years |
|-------------------------------------------|----------------------------|------------------------------------|----------------------------------------------------------|
| WPPSI-IV Verbal Comprehension Index score | Continuous                 | Predictive mean matching           | 40%                                                      |
| WPPSI-IV Visio-spatial Index score        | Continuous                 | Predictive mean matching           | 40%                                                      |
| WPPSI-IV Fluid Reasoning Index score      | Continuous                 | Predictive mean matching           | 40%                                                      |
| WPPSI-IV Working memory index score       | Continuous                 | Predictive mean matching           | 41%                                                      |
| WPPSI-IV Processing speed index score     | Continuous                 | Predictive mean matching           | 41%                                                      |
| WPPSI-IV FSIQ score                       | Continuous                 | Predictive mean matching           | 41%                                                      |
| SDQ Emotional difficulties score          | Continuous                 | Predictive mean matching           | 40%                                                      |
| SDQ Peer relations score                  | Continuous                 | Predictive mean matching           | 40%                                                      |
| SDQ Hyperactivity score                   | Continuous                 | Predictive mean matching           | 40%                                                      |
| SDQ Conduct problems score                | Continuous                 | Predictive mean matching           | 40%                                                      |
| School enrolment                          | Binary                     | Logistic regression                | 32%                                                      |
| Support at school, special schooling      | Categorical (3 categories) | Multinomial regression             | 32%                                                      |
| Complex developmental intervention‡       | Binary                     | Logistic regression                | 33%                                                      |
| Request to “MDPH”                         | Binary                     | Logistic regression                | 34%                                                      |
| Parents’ concerns about child development | Binary                     | Logistic regression                | 33%-34%                                                  |

ASQ=Ages and Stages questionnaire (Squire, 2009); WPPSI-IV=Wechsler Preschool and Primary Scale of Intelligence-Fourth edition (Wechsler, 2014); FSIQ= Full-Scale Intelligence quotient; MABC-2=Movement Assessment Battery for Children- Second Edition (Henderson, 2007); SDQ= Strengths and Difficulties Questionnaire (Goodman, 1997); MDPH= « Maison départementale des personnes handicapées », a French institution that provides educational support or grants money to parents according to the level of disability.

All variables were included as predictors in all imputation models.

\* Defined as the highest occupational status between occupations of the mother and the father, or mother only if living alone.

† Small-for- gestational age was defined as birth weight less than the 10th percentile for gestational age and sex based on French intrauterine growth curves (Ego, 2016).

‡ At least two consultations with psychologist, psychiatrist, orthoptist, speech therapist, occupational therapist, physiotherapist, during the twelve previous months or care in a rehabilitation centre.

**Web appendix 3.** Comparison of participating and non-participating children to the 5 years follow-up in the EPIPAGE-2 study. Values are number of events/number in groups and percentages\*.

|                                                         | 24-26 weeks            |      |                            |      |              | 27-31 weeks            |      |                            |      |              | 32-34 weeks            |      |                            |      |              |
|---------------------------------------------------------|------------------------|------|----------------------------|------|--------------|------------------------|------|----------------------------|------|--------------|------------------------|------|----------------------------|------|--------------|
|                                                         | Participating children |      | Non-participating children |      | Chi2 p-value | Participating children |      | Non-participating children |      | Chi2 p-value | Participating children |      | Non-participating children |      | Chi2 p-value |
|                                                         | n=379                  |      | n=164                      |      |              | n=1934                 |      | n=776                      |      |              | n=770                  |      | n=417                      |      |              |
| <b>Maternal characteristics at birth</b>                |                        |      |                            |      |              |                        |      |                            |      |              |                        |      |                            |      |              |
| <b>Maternal age</b>                                     |                        |      |                            |      |              |                        |      |                            |      |              |                        |      |                            |      |              |
| <25 years                                               | 58/379                 | 15.3 | 48/164                     | 29.3 | <0.001       | 298/1934               | 15.4 | 208/776                    | 26.8 | <0.001       | 78/770                 | 10.1 | 93/417                     | 22.3 | <0.001       |
| 25-34 years                                             | 242/379                | 63.9 | 83/164                     | 50.6 |              | 1194/1934              | 61.7 | 402/776                    | 51.8 |              | 499/770                | 64.8 | 247/417                    | 59.2 |              |
| ≥35 years                                               | 79/379                 | 20.8 | 33/164                     | 20.1 |              | 442/1934               | 22.9 | 166/776                    | 21.4 |              | 193/770                | 25.1 | 77/417                     | 18.5 |              |
| <b>Birth in France</b>                                  | 293/378                | 77.5 | 102/157                    | 65.0 | 0.003        | 1544/1927              | 80.1 | 516/755                    | 68.3 | <0.001       | 669/769                | 87.0 | 293/409                    | 71.6 | <0.001       |
| <b>Live with partner</b>                                | 327/360                | 90.8 | 122/152                    | 80.3 | 0.001        | 1698/1827              | 92.9 | 637/727                    | 87.6 | <0.001       | 700/738                | 94.9 | 333/396                    | 84.1 | <0.001       |
| <b>Parents' socio-economic status‡</b>                  |                        |      |                            |      |              |                        |      |                            |      |              |                        |      |                            |      |              |
| Professional                                            | 97/359                 | 27.0 | 16/149                     | 10.7 | <0.001       | 450/1857               | 24.2 | 93/709                     | 13.1 | <0.001       | 203/743                | 27.3 | 62/382                     | 16.2 | <0.001       |
| Intermediate                                            | 80/359                 | 22.3 | 14/149                     | 9.4  |              | 433/1857               | 23.3 | 104/709                    | 14.7 |              | 191/743                | 25.7 | 61/382                     | 16.0 |              |
| Administrative, public service, self-employed, students | 76/359                 | 21.2 | 43/149                     | 28.9 |              | 505/1857               | 27.2 | 215/709                    | 30.3 |              | 185/743                | 24.9 | 125/382                    | 32.7 |              |
| Shop assistants, service workers                        | 58/359                 | 16.2 | 31/149                     | 20.8 |              | 225/1857               | 12.1 | 135/709                    | 19.0 |              | 87/743                 | 11.7 | 65/382                     | 17.0 |              |
| Manual workers, unemployed                              | 48/359                 | 13.4 | 45/149                     | 30.2 |              | 244/1857               | 13.1 | 162/709                    | 22.8 |              | 77/743                 | 10.4 | 69/382                     | 18.1 |              |
| <b>Maternal level of education†</b>                     |                        |      |                            |      |              |                        |      |                            |      |              |                        |      |                            |      |              |
| Primary or no education                                 | 37/366                 | 10.1 | 28/129                     | 21.7 | <0.001       | 181/1870               | 9.7  | 123/648                    | 19.0 | <0.001       | 65/746                 | 8.7  | 59/352                     | 16.8 | <0.001       |
| Secondary school                                        | 55/366                 | 15.0 | 30/129                     | 23.3 |              | 341/1870               | 18.2 | 158/648                    | 24.4 |              | 120/746                | 16.1 | 79/352                     | 22.4 |              |
| High school                                             | 80/366                 | 21.9 | 31/129                     | 24   |              | 383/1870               | 20.5 | 158/648                    | 24.4 |              | 147/746                | 19.7 | 91/352                     | 25.9 |              |
| Degree                                                  | 85/366                 | 23.2 | 28/129                     | 21.7 |              | 441/1870               | 23.6 | 100/648                    | 15.4 |              | 180/746                | 24.1 | 53/352                     | 15.1 |              |
| Post graduate or higher                                 | 109/366                | 29.8 | 12/129                     | 9.3  |              | 524/1870               | 28.0 | 109/648                    | 16.8 |              | 234/746                | 31.4 | 70/352                     | 19.9 |              |
| <b>Obstetric factors</b>                                |                        |      |                            |      |              |                        |      |                            |      |              |                        |      |                            |      |              |
| <b>Primiparous</b>                                      | 226/374                | 60.4 | 78/162                     | 48.1 | 0.001        | 1068/1915              | 55.8 | 374/766                    | 48.8 | <0.001       | 430/763                | 56.4 | 215/407                    | 52.8 | <0.001       |
| <b>Multiple pregnancy</b>                               | 128/379                | 33.8 | 48/164                     | 29.3 | 0.30         | 646/1934               | 33.4 | 232/776                    | 29.9 | 0.078        | 305/770                | 39.6 | 137/417                    | 32.9 | 0.022        |
| <b>Antenatal steroids</b>                               | 307/374                | 82.1 | 132/162                    | 81.5 | 0.87         | 1630/1898              | 85.9 | 623/760                    | 82.0 | 0.011        | 565/755                | 74.8 | 289/406                    | 71.2 | 0.18         |
| <b>Caesarean section</b>                                | 186/375                | 49.6 | 74/162                     | 45.7 | 0.40         | 1370/1926              | 71.1 | 515/768                    | 67.1 | 0.037        | 434/769                | 56.4 | 213/413                    | 51.6 | 0.11         |
| <b>Neonatal characteristics at birth</b>                |                        |      |                            |      |              |                        |      |                            |      |              |                        |      |                            |      |              |
| <b>Male gender</b>                                      | 190/379                | 50.1 | 86/164                     | 52.4 | 0.62         | 1013/1934              | 52.4 | 411/776                    | 53.0 | 0.78         | 435/770                | 56.5 | 203/417                    | 48.7 | 0.01         |
| <b>Small-for-gestational age‡</b>                       | 76/379                 | 20.1 | 29/164                     | 17.7 | 0.52         | 739/1934               | 38.2 | 291/776                    | 37.5 | 0.73         | 254/769                | 33.0 | 127/417                    | 30.5 | 0.36         |
| <b>Severe neonatal morbidities¶</b>                     | 134/360                | 37.2 | 67/152                     | 44.1 | 0.15         | 225/1844               | 12.2 | 83/744                     | 11.2 | 0.46         | 17/732                 | 2.3  | 6/381                      | 1.6  | 0.41         |
| <b>At 2 years corrected age</b>                         |                        |      |                            |      |              |                        |      |                            |      |              |                        |      |                            |      |              |
| <b>Cerebral palsy</b>                                   | 20/352                 | 5.7  | 11/96                      | 11.5 | 0.048        | 75/1803                | 4.2  | 22/462                     | 4.8  | 0.57         | 9/693                  | 1.3  | 0/191                      | 0.0  | -            |
| <b>ASQ scores below threshold**</b>                     | 168/322                | 52.2 | 40/83                      | 48.2 | 0.52         | 681/1722               | 39.5 | 182/399                    | 45.6 | 0.026        | 229/688                | 33.3 | 60/194                     | 30.9 |              |

\* Observed data. Denominators vary according to the number of missing data for each variable.

† Defined as the highest occupational status between occupations of the mother and the father, or mother only if living alone.

‡ Small-for-gestational age was defined as birth weight less than the 10th percentile for gestational age and sex based on French intrauterine growth curves (Ego, 2016).

§ Intraventricular haemorrhage grade III or IV or cystic periventricular leukomalacia.

¶ Severe neonatal morbidity was defined as severe bronchopulmonary dysplasia or necrotizing enterocolitis stage 2-3 or severe retinopathy of prematurity stage >3 or any of the following severe cerebral abnormalities on cranial ultrasonography: intraventricular haemorrhage grade III or IV or cystic periventricular leukomalacia (Ancel, 2015).

\*\* Ages and Stages Questionnaire. For each domain, a score lower than 2 standard deviations from the mean, using established screening cut-off points (Squire, 2009), was reported. If a score was below threshold in at least one domain, the global ASQ score was considered below threshold.

**Web appendix 4.** Comparison of children with data collected during a clinical examination or with a postal questionnaire at 5½ years in the EPIPAGE-2 study. Values are number of events/number in groups and weighted percentages\*.

|                                                           | Clinical examination<br>n=2718 |      | Postal questionnaire <sup>†</sup><br>n=365 |      | Chi2 p-value |
|-----------------------------------------------------------|--------------------------------|------|--------------------------------------------|------|--------------|
| <b><u>Neonatal characteristics at birth</u></b>           |                                |      |                                            |      |              |
| <b>Gestational age</b>                                    |                                |      |                                            |      |              |
| 24-26 weeks                                               | 340/2718                       | 4.6  | 39/365                                     | 3.8  | 0.61         |
| 27-29 weeks                                               | 790/2718                       | 14.5 | 101/365                                    | 13.2 |              |
| 30-31 weeks                                               | 916/2718                       | 16.8 | 127/365                                    | 16.6 |              |
| 32-34 weeks                                               | 672/2718                       | 64.1 | 98/365                                     | 66.5 |              |
| <b>Male gender</b>                                        | 1453/2718                      | 55.1 | 185/365                                    | 53.8 | 0.72         |
| <b>Small-for-gestational age<sup>‡</sup></b>              | 943/2718                       | 33.9 | 126/364                                    | 35   | 0.75         |
| <b><u>Maternal characteristics at birth</u></b>           |                                |      |                                            |      |              |
| <b>Maternal age</b>                                       |                                |      |                                            |      |              |
| <25 years                                                 | 376/2718                       | 11.6 | 58/365                                     | 15   | 0.18         |
| 25-34 years                                               | 1710/2718                      | 63.7 | 225/365                                    | 64.7 |              |
| ≥35 years                                                 | 632/2718                       | 24.7 | 82/365                                     | 20.3 |              |
| <b>Born in France</b>                                     | 2214/2710                      | 84.3 | 292/364                                    | 85   | 0.79         |
| <b>Living with partner</b>                                | 2407/2577                      | 94.5 | 318/348                                    | 90.9 |              |
| <b>Parents' socio-economic status<sup>§</sup></b>         |                                |      |                                            |      |              |
| Professional                                              | 671/2607                       | 26.9 | 79/352                                     | 22.2 | 0.003        |
| Intermediate                                              | 644/2607                       | 25.8 | 60/352                                     | 18.2 |              |
| Administrative, public service, self-employed, students   | 666/2607                       | 25.3 | 100/352                                    | 26.1 |              |
| Shop assistants, service workers                          | 322/2607                       | 11.5 | 48/352                                     | 16   |              |
| Manual workers                                            | 304/2607                       | 10.5 | 65/352                                     | 17.5 |              |
| <b>Maternal level of education</b>                        |                                |      |                                            |      |              |
| Primary or no education                                   | 236/2636                       | 8.5  | 47/346                                     | 13.2 | 0.027        |
| Secondary school                                          | 442/2636                       | 16.2 | 74/346                                     | 20.6 |              |
| High school                                               | 532/2636                       | 19.8 | 78/346                                     | 21.6 |              |
| Degree                                                    | 636/2636                       | 24.2 | 70/346                                     | 21.8 |              |
| Post graduate or higher                                   | 790/2636                       | 31.3 | 77/346                                     | 22.7 |              |
| <b><u>Obstetric factors</u></b>                           |                                |      |                                            |      |              |
| <b>Primiparous</b>                                        | 1531/2691                      | 56.3 | 193/361                                    | 57   | 0.15         |
| <b>Multiple pregnancy</b>                                 | 946/2718                       | 37.6 | 133/365                                    | 36   | 0.66         |
| <b>Antenatal steroids</b>                                 | 2209/2669                      | 79.1 | 293/358                                    | 74.9 | 0.2          |
| <b>Caesarean section</b>                                  | 1755/2706                      | 61.3 | 235/364                                    | 56.3 | 0.18         |
| <b><u>Neonatal period</u></b>                             |                                |      |                                            |      |              |
| <b>Severe neonatal morbidities<sup>¶</sup></b>            | 337/2600                       | 7.1  | 39/336                                     | 6.4  | 0.63         |
| <b><u>At 5 ½ years</u></b>                                |                                |      |                                            |      |              |
| <b>Cerebral palsy</b>                                     | 134/2705                       | 3.6  | 18/353                                     | 2.9  | 0.48         |
| <b>Moderate or severe visual disability<sup>**</sup></b>  | 15/2599                        | 0.5  | 6/345                                      | 2    | 0.02         |
| <b>Moderate or severe hearing disability<sup>††</sup></b> | 24/2661                        | 0.7  | 4/339                                      | 1.7  | 0.19         |

\* Observed data, denominators vary according to the number of missing data for each variable. Percentages are weighted to take into account the differences in survey design between gestational age groups. Due to this, proportions are not exactly n/N.

<sup>†</sup>Postal questionnaires were proposed in one region (13 subjects), and elsewhere for parents refusing formal assessment or if the assessment team was not available (n=345)

<sup>‡</sup> Small-for-gestational age was defined as birth weight less than the 10th percentile for gestational age and sex based on French intrauterine growth curves (Ego, 2016).

<sup>§</sup>Defined as the highest occupational status between occupations of the mother and the father, or mother only if living alone.

<sup>¶</sup> Severe neonatal morbidity was defined as severe bronchopulmonary dysplasia or necrotizing enterocolitis stage 2-3 or severe retinopathy of prematurity stage >3 or any of the following severe cerebral abnormalities on cranial ultrasonography: intraventricular haemorrhage grade III or IV or cystic periventricular leukomalacia (Ancel, 2015).

<sup>\*\*</sup> Blindness or binocular visual corrected acuity <3.2/10.

<sup>††</sup> Uni- or bilateral deafness, hearing loss > 40 dB not corrected or partially corrected with hearing aid.

**Web appendix 5.** Classification of neurodevelopmental disabilities at 5½ years by gestational age group among survivors in the EPIPAGE-2 study. Values are percentages (95% confidence interval). Data are corrected for study design and respondent selection\*.

|                                                                                                       | Preterm children        |                                |                         |                                |                         |                                | P for trend† | Reference sample born at term |
|-------------------------------------------------------------------------------------------------------|-------------------------|--------------------------------|-------------------------|--------------------------------|-------------------------|--------------------------------|--------------|-------------------------------|
|                                                                                                       | 24-26 weeks             |                                | 27-31 weeks             |                                | 32-34 weeks             |                                |              |                               |
|                                                                                                       | No./Total<br>% (95% CI) | Multiple imputation % (95% CI) | No./Total<br>% (95% CI) | Multiple imputation % (95% CI) | No./Total<br>% (95% CI) | Multiple imputation % (95% CI) |              |                               |
| <b>Neurodevelopmental disabilities §</b>                                                              |                         |                                |                         |                                |                         |                                |              |                               |
| No.                                                                                                   | 327                     |                                | 1636                    |                                | 655                     |                                |              |                               |
| Severe                                                                                                | 8.3 (5.5 to 11.8)       | <b>11.9 (8.6 to 15.3)</b>      | 5.2 (4.2 to 6.4)        | <b>6.7 (5.5 to 8.0)</b>        | 1.5 (0.7 to 2.8)        | <b>3.0 (1.7 to 4.4)</b>        | <0.001‡      | 1.1 (0.2 to 3.6)              |
| Moderate                                                                                              | 11.6 (8.4 to 15.6)      | <b>15.8 (12.1 to 19.6)</b>     | 9.5 (8.2 to 11.1)       | <b>12.0 (10.4 to 13.6)</b>     | 6.3 (4.5 to 8.4)        | <b>8.6 (6.5 to 10.7)</b>       |              | 3.9 (1.6 to 8.0)              |
| Mild                                                                                                  |                         |                                |                         |                                |                         |                                |              |                               |
| with cerebral palsy-GMFC1 and/or mild sensory or cognitive impairments                                | 32.4 (27.4 to 37.8)     | <b>31.6 (27 to 36.3)</b>       | 29 (26.8 to 31.2)       | <b>30.0 (27.6 to 32.3)</b>     | 27.2 (23.8 to 30.8)     | <b>28.7 (25.2 to 32.2)</b>     |              | 15.7 (11.4 to 20.9)           |
| with DCD and/or behavioural difficulties only                                                         | 8.0 (5.3 to 11.4)       | <b>6.9 (4.5 to 9.4)</b>        | 6.2 (5.1 to 7.5)        | <b>5.8 (4.7 to 6.9)</b>        | 4.9 (3.4 to 6.8)        | <b>5.1 (3.4 to 6.7)</b>        |              | 7.3 (4.4 to 11.1)             |
| None                                                                                                  | 39.8 (34.4 to 45.3)     | <b>33.7 (29.2 to 38.2)</b>     | 50.1 (47.6 to 52.5)     | <b>45.5 (43.1 to 48.0)</b>     | 60.2 (56.3 to 63.9)     | <b>54.6 (50.6 to 58.7)</b>     |              | 72.0 (66.0 to 77.5)           |
| <b>Impaired domains in the group with mild NDD</b>                                                    |                         |                                |                         |                                |                         |                                |              |                               |
| No.                                                                                                   | 110                     |                                | 192                     |                                | 92                      |                                |              |                               |
| Cerebral palsy-GMFC1 and/or mild sensory or cognitive impairments only                                | 53.6 (43.9 to 63.2)     | <b>49.0 (40.7 to 57.3)</b>     | 62.7 (58.3 to 66.9)     | <b>61.7 (57.8 to 65.7)</b>     | 69.3 (62.2 to 75.7)     | <b>67.6 (61.1 to 74)</b>       | 0.001‡       | 48.0 (34.1 to 62.1)           |
| Cerebral palsy-GMFC1 and/or mild sensory or cognitive impairments and DCD or behavioural difficulties | 25.5 (17.6 to 34.6)     | <b>33.0 (25.6 to 40.5)</b>     | 18.4 (15.1 to 22)       | <b>22.1 (18.9 to 25.3)</b>     | 15.1 (10.4 to 21.0)     | <b>17.4 (12.6 to 22.2)</b>     |              | 19.2 (8.6 to 34.4)            |
| DCD and/or behavioural difficulties only                                                              | 20.9 (13.7 to 29.7)     | <b>18.0 (12.0 to 24.0)</b>     | 18.9 (15.6 to 22.6)     | <b>16.2 (13.2 to 19.1)</b>     | 15.6 (10.8 to 21.5)     | <b>15.1 (10.4 to 19.8)</b>     |              | 32.8 (20.7 to 46.9)           |

NDD= Neurodevelopmental disabilities; GMFC1= Gross Motor Function Classification System (Ghassabian, 2016); DCD=Developmental coordination disorders.

\* For the group of preterm-born children, results of both observed data and imputed data were reported. For term-born children (37-41 weeks), data are weighted using calibration weighting (Web appendix 1).

† Test for linear trend across gestational age groups, after multiple imputation. GEE based test to account for non-independence of outcomes related to multiple births.

‡ Chi-squared test for difference between 24-26 weeks, 27-31 weeks and 32-34 weeks, after multiple imputation. GEE based test to account for non-independence of outcomes related to multiple births.

§ Include cerebral palsy, vision, hearing, full-scale intelligence quotient, developmental coordination disorders and behavioural difficulties (see Box 1).

**Web appendix 6.** Factors associated with neurodevelopmental disabilities at 5½ years in the EPIPAGE-2 study, among preterm children survivors. Observed data.

|                                                         | Neurodevelopmental disabilities* |      |                    |      | Model 1             |                      |             | Model 2             |                      |             |
|---------------------------------------------------------|----------------------------------|------|--------------------|------|---------------------|----------------------|-------------|---------------------|----------------------|-------------|
|                                                         | None                             | Mild | Severe or Moderate | Mild | Severe or Moderate  | p-value              | Mild        | Severe or Moderate  | p-value              |             |
|                                                         | N                                | %    | %                  | %    | aOR (95%CI)         |                      | aOR (95%CI) | aOR (95%CI)         |                      | aOR (95%CI) |
| <b>Gestational age (weeks)</b>                          |                                  |      |                    |      |                     |                      |             |                     |                      |             |
| 24                                                      | 36                               | 38.9 | 36.1               | 25.0 | 1.36 (0.58 to 3.18) | 4.67 (1.71 to 12.78) | <.001       | 1.43 (0.60 to 3.40) | 4.35 (1.40 to 13.58) | <.001       |
| 25                                                      | 101                              | 39.6 | 41.6               | 18.8 | 1.54 (0.93 to 2.54) | 3.45 (1.57 to 7.58)  |             | 1.52 (0.90 to 2.56) | 4.26 (1.88 to 9.64)  |             |
| 26                                                      | 190                              | 40.0 | 40.5               | 19.5 | 1.48 (0.98 to 2.25) | 3.53 (1.89 to 6.62)  |             | 1.51 (0.99 to 2.31) | 4.11 (2.14 to 7.89)  |             |
| 27                                                      | 208                              | 33.2 | 43.8               | 23.1 | 1.93 (1.28 to 2.91) | 5.05 (2.72 to 9.39)  |             | 1.76 (1.16 to 2.67) | 4.14 (2.15 to 7.99)  |             |
| 28                                                      | 259                              | 47.9 | 35.5               | 16.6 | 1.09 (0.75 to 1.57) | 2.52 (1.40 to 4.53)  |             | 1.04 (0.71 to 1.51) | 2.60 (1.41 to 4.82)  |             |
| 29                                                      | 290                              | 50.3 | 35.5               | 14.1 | 1.03 (0.72 to 1.48) | 2.04 (1.13 to 3.67)  |             | 0.99 (0.68 to 1.43) | 2.10 (1.13 to 3.91)  |             |
| 30                                                      | 399                              | 51.1 | 36.8               | 12.0 | 1.06 (0.76 to 1.47) | 1.71 (0.96 to 3.04)  |             | 0.99 (0.71 to 1.39) | 1.70 (0.94 to 3.09)  |             |
| 31                                                      | 480                              | 57.5 | 29.8               | 12.7 | 0.76 (0.55 to 1.05) | 1.60 (0.92 to 2.79)  |             | 0.71 (0.50 to 0.99) | 1.74 (0.98 to 3.09)  |             |
| 32                                                      | 153                              | 62.7 | 28.1               | 9.2  | 0.66 (0.42 to 1.03) | 1.06 (0.51 to 2.21)  |             | 0.58 (0.36 to 0.91) | 0.93 (0.43 to 2.02)  |             |
| 33                                                      | 198                              | 66.2 | 26.8               | 7.1  | 0.59 (0.39 to 0.90) | 0.78 (0.38 to 1.60)  |             | 0.62 (0.41 to 0.94) | 0.83 (0.39 to 1.75)  |             |
| 34                                                      | 304                              | 54.9 | 37.5               | 7.6  | 1                   | 1                    |             | 1                   | 1                    |             |
| <b>Sex</b>                                              |                                  |      |                    |      |                     |                      |             |                     |                      |             |
| Female                                                  | 1213                             | 53.3 | 34.1               | 12.6 | 1                   | 1                    | 0.072       | 1                   | 1                    | 0.020       |
| Male                                                    | 1405                             | 49.6 | 35.9               | 14.5 | 1.16 (0.97 to 1.38) | 1.30 (1.01 to 1.66)  |             | 1.19 (0.99 to 1.43) | 1.43 (1.10 to 1.87)  |             |
| <b>Pregnancy</b>                                        |                                  |      |                    |      |                     |                      |             |                     |                      |             |
| Single                                                  | 1701                             | 50.2 | 35.8               | 14.0 | 1                   | 1                    | 0.59        | 1                   | 1                    | 0.92        |
| Multiple                                                | 917                              | 53.3 | 33.7               | 13.0 | 0.91 (0.75 to 1.10) | 0.91 (0.69 to 1.21)  |             | 1.03 (0.84 to 1.26) | 1.06 (0.79 to 1.43)  |             |
| <b>Small-for-gestational age†</b>                       |                                  |      |                    |      |                     |                      |             |                     |                      |             |
| No                                                      | 1709                             | 53.5 | 36.0               | 11.9 | 1                   | 1                    | <.001       | 1                   | 1                    | <.001       |
| Yes                                                     | 909                              | 47.2 | 34.6               | 16.8 | 1.25 (1.04 to 1.50) | 1.75 (1.37 to 2.25)  |             | 1.24 (1.02 to 1.50) | 1.75 (1.35 to 2.28)  |             |
| <b>Parents' socio-economic status‡</b>                  |                                  |      |                    |      |                     |                      |             |                     |                      |             |
| Professional                                            | 651                              | 65.4 | 27.8               | 6.8  | 1                   | 1                    | <.001       | 1                   | 1                    | <.001       |
| Intermediate                                            | 623                              | 54.7 | 35.8               | 9.5  | 1.50 (1.16 to 1.94) | 1.66 (1.06 to 2.61)  |             | 1.50 (1.16 to 1.94) | 1.65 (1.05 to 2.59)  |             |
| Administrative, public service, self-employed, students | 647                              | 48.1 | 36.2               | 15.8 | 1.73 (1.34 to 2.23) | 3.18 (2.09 to 4.83)  |             | 1.71 (1.33 to 2.21) | 3.10 (2.04 to 4.73)  |             |
| Shop assistants, service workers                        | 305                              | 41.0 | 40.3               | 18.7 | 2.20 (1.60 to 3.02) | 4.15 (2.57 to 6.69)  |             | 2.19 (1.59 to 3.01) | 4.11 (2.55 to 6.64)  |             |
| Manual workers, unemployed                              | 284                              | 32.7 | 43.0               | 24.3 | 2.99 (2.13 to 4.21) | 6.96 (4.32 to 11.19) |             | 3.01 (2.13 to 4.24) | 7.00 (4.36 to 11.24) |             |

Model 1 : adjusted for gestational age. GEE for multinomial outcome model to account for non-independence of outcomes related to multiple births.

Model 2: adjusted for gestational age, gender, single or multiple pregnancy, small-for-gestational age and parents' socio-economic status. GEE for multinomial outcome model to account for non-independence of outcomes related to multiple births.

\*Include cerebral palsy, vision, hearing, full-scale intelligence quotient, developmental coordination disorders and behavioural difficulties (see Box 1).

† Small-for- gestational age was defined as birth weight <10th percentile for gestational age and sex based on French intrauterine growth curves (Ego 2016).

‡ Defined as the highest occupational status between occupations of the mother and the father, or mother only if living alone.
