# Supplementary material for: Neurodevelopmental outcomes at age 5 among children born preterm: EPIPAGE-2 cohort study
Source: PubMed Central journal article supplement — BMJ. 2021 Apr 28;373:n741. doi: 10.1136/bmj.n741 (PMC8080137; doi:10.1136/bmj.n741), 2021-04-28
Supplement: piev063241.ww2.pdf [file piev063241.ww2.pdf]

## Epipage-2 writing group

**Bruno Langer**, Department of Gynecology and Obstetrics, Strasbourg University Hospital, France; **Jacqueline Matis**, Department of Medico-surgical Pediatric, Strasbourg University Hospital, France; **Pierre Kuhn**, Department of Medico-surgical Pediatric, Strasbourg University Hospital, France. **Muriel Rebola**, Department of Neonatology, Bordeaux University Hospital, Bordeaux, France; **Laurent Renesme**, Department of Neonatology, Bordeaux University Hospital, Bordeaux, France; **Laurent Joly**, Department of Neonatology, Bordeaux University Hospital, Bordeaux, France. **Benedicte Lecomte**, University Hospital Estaing, Clermont-Ferrand, France. **Valerie Datin-Dorriere**, Department of Neonatology, Caen University Hospital, France, Université de Paris, CNRS UMR 8240 « LaPsyDé », Laboratoire A Binet, Sorbonne, Paris, France; **Bernard Guillois**, Caen-Normandie University, Psychology Laboratory Caen Normandie, EA 7452, Caen University, Caen, France. **Antoine Burguet**, Department of Neonatal Pediatrics, Dijon University Hospital, Dijon, France; **Denis Semama** Department of Neonatal Pediatrics, Dijon University Hospital, Dijon, France. **Jean-Michel Roué**, Department of Neonatal Medicine, Brest University Hospital, F-29200, Brest, France, **Gilles Bretaudeau**, CAMPS, Rennes University Hospital, Rennes, France; **Florence Rouget**, Department of Pediatrics, Rennes University Hospital, Inserm, EHESP, Irset (Institut de Recherche en Santé, Environnement et Travail), UMR\_S 1085, Rennes, France. **Elie Saliba**, UMR 1253, iBrain, Tours University, Inserm, Tours, France; **Géraldine Favrais**, UMR 1253, iBrain, Tours University, Inserm, Tours, France. **Nathalie Bednarek**, Department of Neonatal Pediatrics, Reims University Hospital, Alix de Champagne, CReSTIC EA3804, URCA, Reims, France; **Gauthier Loron**, Department of Neonatal Pediatrics, Reims University Hospital, Alix de Champagne, CReSTIC EA3804, URCA, Reims, France. **Gerard Thiriez**, Department of Neonatology, Besançon University Hospital, Besançon, France; **Alexandra Chadie**, Department of Neonatal Pediatrics and Intensive Care Charles-Nicolle Hospital, Rouen University Hospital, Rouen, France; **Gaëlle de la Villéon**, Department of Neonatal Pediatrics and Intensive Care Charles-Nicolle Hospital, Rouen University Hospital, Rouen, France. **Xavier Durrmeyer**, Department of Neonatal Pediatrics and Intensive Care, CHI, CRC, Créteil, France, **Michèle Granier**, Department of Neonatal Pediatrics, Sud Francilien Hospital, Evry, France, **Pascal Boileau**, Department of Neonatal Pediatrics, Poissy Saint Germain University Hospital, Poissy, France, **Gilles Kayem**, Department of Obstetrics and Gynecology, Trousseau Hospital, APHP, Paris, France; Inserm UMR 1153, Obstetrical, Perinatal and Pediatric Epidemiology Research Team (Epopé), Center for Epidemiology and Statistics Sorbonne Paris Cité, DHU Risks in pregnancy, Paris Descartes University, France, **Pierre-Henri Jarreau**, Service de Médecine et Réanimation Néonatales de Port-Royal, Hôpitaux Universitaires Paris Centre Site Cochin, Université Paris V René Descartes and Assistance Publique Hôpitaux de Paris, Paris, France, **Laurence Foix-L'Hélias**, Obstetrical, Perinatal, and Pediatric Epidemiology Team, Epidemiology and Biostatistics Sorbonne Paris Cité Research Center (U1153), INSERM, Paris, France; Paris Descartes University, Paris, France, Department of Neonatology, Trousseau Hospital, APHP, Paris, France; **Pierre Boulot**, Department of Obstetrics and Gynecology, Arnaud de Villeneuve University Hospital, Montpellier, France; **Hubert Daudé**, CAMSP, Saint-Eloi University Hospital, Montpellier, France. **Antoine Bédu**, Department of neonatal pediatrics and intensive care, Limoges University Hospital, Limoges, France, **Fabienne Mons**, Department of neonatal pediatrics and intensive care, Limoges University Hospital, Limoges, France; **Hélène Deforge**, Neonatal department, Maternity unit, Nancy University Hospital, Laboratoire Lorrain de Psychologie et Neurosciences de la dynamique des comportements (EA7489), Nancy, France; **Jeanne Fresson**, Department of medical information, Maternity unit, Nancy University Hospital and Perinatal Network Lorraine,

Nancy, France; **Christophe Vayssière**, UMR1027 Inserm, Toulouse 3 University, Toulouse France; Maternity unit, Paule de Viguier Hospital, Toulouse University Hospital, Toulouse, France; **Sophie Breinig**, UMR1027 Inserm, Toulouse 3 University, Toulouse France; Neonatal and pediatric intensive care unit, Children's Hospital, Toulouse University Hospital, Toulouse, France. **Patrick Truffert**, CHU Lille, Department of Neonatal Medicine, Jeanne de Flandre Hospital, F-59000 Lille, France; **Alexandra Nuytten**, CHU Lille, Department of Neonatal Medicine, Jeanne de Flandre Hospital, F-59000 Lille, France; **Marie Laure Charkaluk**, INSERM UMR 1153, Obstretical, Perinatal and Pediatric Epidemiology Research Team (Epopé), Center for Epidemiology and Statistics Sorbonne Paris Cité, DHU Risks in Pregnancy, Paris University, Paris, France, UCLille, Lille, France, Department of Neonatal Medicine, Saint Vincent de Paul Hospital, Groupement des Hôpitaux de l'Institut Catholique Lillois/ Medicine and maieutics school, Lille, France; **Veronique Brevaut**, Department of Neonatal Pediatrics and Intensive Care, Nord Hospital, Marseille, France; **Meriem Zahed**, Department of Neonatal Pediatrics and Intensive Care, Nord Hospital, Marseille, France; **Patricia Garcia**, Department of Neonatal Pediatrics and Intensive Care, Conception Hospital, Marseille, France; **Laurence Fayol**, Department of Neonatal Pediatrics and Intensive Care, Conception Hospital, Marseille, France; **Cyril Flamant**, Neonatal Department, Nantes University Hospital, Nantes, France; **Jean-Baptiste Muller**, Neonatal Department, Nantes University Hospital, Nantes, France; **Géraldine Gascoin**, Neonatal Department, Angers University Hospital, Angers, France. **André Leke**, PériTox UMI-01, Picardie Jules Verne University, Department of Neonatal Pediatrics and Intensive Care, Amiens University Hospital, Picardie, France; **Cécile Fontaine**, PériTox UMI-01, Picardie Jules Verne University, Department of Neonatal Pediatrics and Intensive Care, Amiens University Hospital, Picardie, France. **Olivier Claris**, Department of Neonatal Pediatrics and Intensive Care, University Hospital, Lyon, France, **Jean-Charles Picaud**, Neonatal intensive care unit, Croix-Rousse University Hospital, Hospices Civils de Lyon, Lyon, France, CarMe Unit INSERM U1060, INRA U1397, Claude Bernard University Lyon 1, Pierre Bénite France; **Anne Ego**, Grenoble Alpes University, CNRS, Public Health Department, Grenoble Alpes University Hospital, Grenoble Institute of Engineering. Grenoble Alpes University, INSERM CIC U1406, Grenoble, France, TIMC-IMAG, Grenoble, France; **Hughes Patural**, Neonatal Pediatrics and Intensive Care Unit, Mother-Child Department, Saint-Étienne University Hospital, Saint-Étienne, France. **Anne Poulichet**, Department of Neonatology, University Hospital of Pointe à Pitre, French West Indies, Guadeloupe, France; **Aude Abrial**, Department of Neonatology, University Hospital of Pointe à Pitre, French West Indies, Guadeloupe, France. **Anne Favre**, Department of Neonatal Pediatrics and Intensive Care, Andrée Rosemon Hospital, Cayenne, Guyane. **Olivier Fléchelles**, University Hospital, Fort de France, Martinique. **Duksha Ramful**, Pediatric and Neonatal Intensive Care Unit, Félix Guyon University Hospital, Saint-Denis, Reunion Island; INSERM, CIC 1410, Saint-Pierre, Reunion Island; **Magali Carbonnier**, Pediatric and Neonatal Intensive Care Unit, Sud Reunion University Hospital, Saint-Pierre, Reunion Island, France. French Institute for Medical Research and Health, UMR 1153 Centre for Research in Epidemiology and Statistics Paris University (CRESS), Team Early Life Research on Later Health, Villejuif, France. **Thierry Simeon**, French Institute for Demographic Studies (INED), French Institute for Medical Research and Health (INSERM), French Blood Agency (EFS), ELFE Joint Unit, Paris, France.

### **EPIPAGE-2 study group**

**Alsace:** D Astruc, P Kuhn, B Langer, J Matis (Strasbourg), C Ramousset; **Aquitaine:** X Hernandorena (Bayonne), P Chabanier, L Joly-Pedespan (Bordeaux), MJ Costedoat, A Leguen; **Auvergne:** B Lecomte, D Lemery, F Vendittelli (Clermont-Ferrand); **Basse-Normandie:** G

Beucher, M Dreyfus, B Guillois (Caen), Y Toure; **Bourgogne:** A Burguet, S Couvreur, JB Gouyon, P Sagot (Dijon), N Colas; **Bretagne:** J Sizun (Brest), A Beuchée, P Pladys, F Rouget (Rennes), RP Dupuy (St-Brieuc), D Soupre (Vannes), F Charlot , S Roudaut; **Centre:** A Favreau , E Saliba (Tours), L Reboul; **Champagne-Ardenne:** N Bednarek, P Morville (Reims), V Verrière; **Franche-Comté:** G Thiriez (Besançon), C Balamou; **Haute-Normandie:** L Marpeau , S Marret (Rouen), C Barbier; **Ile-de-France:** G Kayem (Colombes), X Durrmeyer (Créteil), M Granier (Evry), M Ayoubi , O Baud , B Carbonne , L Foix L'Hélias, F Goffinet, PH Jarreau , D Mitanchez (Paris), P Boileau (Poissy), L Cornu, R Moras; **Languedoc-Roussillon:** P Boulot , G Cambonie , H Daudé (Montpellier), A Badessi, N Tsaoussis; **Limousin:** A Bédu, F Mons (Limoges), C Bahans; **Lorraine:** MH Binet, J Fresson, JM Hascoët, A Milton, O Morel, R Vieux (Nancy), L Hilpert; **Midi-Pyrénées:** C Alberge, C Arnaud, C Vayssière (Toulouse), M Baron; **Nord-Pas-de-Calais:** ML Charkaluk, V Pierrat, D Subtil, P Truffert (Lille), S Akowanou, D Roche; **Provence Alpes Côte d'Azur et Corse:** C D'Ercole, C Gire, U Simeoni (Marseille), A Bongain (Nice), M Deschamps; **Pays de Loire:** B Branger (FFRSP), JC Rozé, N Winer (Nantes), V Rouger, C Dupont; **Picardie:** J Gondry, G Krim (Amiens), B Baby; **Rhône-Alpes:** M Debeir (Chambéry), O Claris, JC Picaud, S Rubio-Gurung (Lyon), C Cans, A Ego, T Debillon (Grenoble), H Patural (Saint-Etienne), A Rannaud; **Guadeloupe:** E Janky, A Poulichet, JM Rosenthal (Point à Pitre), E Coliné; **Guyane:** A Favre (Cayenne), N Joly; **Martinique:** S Châlons (Fort de France), V Lochelongue; **La Réunion :** PY Robillard (Saint-Pierre), S Samperiz, D Ramful (Saint-Denis).

**Inserm U 1153:** PY Ancel, V Benhammou, B Blondel, M Bonet, A Brinis, ML Charkaluk, A Coquelin, M Durox, L Foix-L'Hélias, F Goffinet, M Kaminski, G Kayem, B Khoshnood, C Lebeaux, E Lorthe, L Marchand-Martin, A S Morgan, V Pierrat, J Rousseau, MJ Saurel-Cubizolles, D Sylla, D Tran, L Vasante-Annamale, J Zeitlin.
